# Supplementary material for: Aging dysregulates D- and E-series resolvins to modulate cardiosplenic and cardiorenal network following myocardial infarction
Source: Aging (Albany NY). 2016 Oct 18;8(11):2611–28. doi: 10.18632/aging.101077 (PMC5191859; doi:10.18632/aging.101077)
Supplement: Supplementary file 2 [file aging-08-2611-s002.xls]

## Sheet: Sheet1
Supplementary table 1: Pre and post-MI lipid mediators levels in spleen (ng/ 50 mg spleen tissue)
		No-MI				MI-d1
	Precursor	Young		Aging		Young		Aging		Pathway	Class
		LC	SO	LC	SO	LC	SO	LC	SO
5(S),12(S)-DiHETE	AA	2068.79	2969.81	2262.59	3867.21	1104±310	2650±607	2386±1162	1860±404	CYP	Diol
5(S),15(S)-DiHETE	AA	11.3186	15.8483	15.0953	23.4898	15±3	20±2	15±9	12±4	CYP	Diol
8(S),15(S)-DiHETE	AA	13.964	28.5165	11.5459	21.932	9±2	16±3	9±5	5±3	CYP	Diol
12(13)-DiHOME	AA	32.6881	18.6127	12.5854	34.1175	12±2	19±3	12±3	13±2	CYP	Diol
9,10-DiHOME	AA	25.0271	41.2128	9.92198	59.1046	14±3	35±7	16±3	21±4	CYP	Diol
5,6-DiHETE(EPA)	EPA	5.01457	6.71031	4.97773	10.7707	3±1	6±1	6±3	4.6±1	CYP	Diol
5,6-DiHETrE	AA	0.797097	1.71731	1.1753	1.77159	1.3±1	2.3±1	1.2±0.6	0.5±0.1	CYP	Diol
11,12-DiHETrE	AA	23.1079	15.8505	21.9958	38.837	17±3	37±10	21±5	23±2	CYP	Diol
8,9-DiHETrE	AA	9.48172	16.2738	10.172	23.7238	8±0.3	20±5	22±11	18±3	CYP	Diol
14,15-DiHETrE	AA	38.5066	25.8201	17.4588	31.8445	16±5	27±7	33±24	20±1	CYP	Diol
19,20-DiHDoPE	DHA	10.2432	4.23819	18.0852	9.05083	11±2	7±1	19±9	8±1	CYP	Diol
9(10)-EpOME	AA	4729.4	13921.4	3910.07	22392.7	2019±664	14132±3630	6948±4986	3672±901	CYP	Epoxide
12(13)-EpOME	AA	1789.94	4679.22	1648.97	9574.21	1062±210	4251±886	2677±1810	1585±406	CYP	Epoxide
8,9-EpETE	EPA	57.8749	51.8656	46.027	101.437	52±21	39±9	43±30	20±9	CYP	Epoxide
11,12-EpETE	EPA	126.903	142.564	146.036	252.057	145±61	106±23	106±68	53±21	CYP	Epoxide
14,15-EpETE	EPA	689.267	764.825	582.502	1319.03	602±238	549±145	523±357	264±93	CYP	Epoxide
17,18-EpETE	EPA	6.27647	8.73784	7.13579	0	15±4	0±0	15±9	0.7±0.7	CYP	Epoxide
8,9-EpETrE	AA	1401.74	587.077	1890.88	1429.35	1329±430	1210±230	2253±1528	682±100	CYP	Diol
11,12-EpETrE	AA	1062.13	1447.6	904.47	1074.5	63±185	1148±182	818±588	298±82	CYP	Diol
5,6-EpETrE	AA	398.851	545.45	304.263	357.346	134±47	296±67	261±191	68±27	CYP	Diol
14,15-EpETrE	AA	0	598.249	0	0	0±0	0±0	167.5±167.5	0±0	CYP	Diol
7(8)-EpDPE	DPA	39.1321	19.2179	38.2512	27.4194	33±8	26±7	73±61	8±1	CYP	Epoxide
10(11)-EpDPE	DPA	446.615	782.231	394.363	1250.69	349±126	950±307	630±491	310±148	CYP	Epoxide
13(14)-EpDPE	DPA	80.5291	49.567	80.4561	71.6666	60±0	53±12	128±106	21±4	CYP	Epoxide
16(17)-EpDPE	DPA	0	39.0653	0	69.735	0±0	46±11	115±115	11±7	CYP	Epoxide
19(20)-EpDPE	DPA	50.8401	26.2842	0	43.1054	0±0	40±7	112±112	9±5	CYP	Epoxide
iPF-VI	AA	0.478514	0.781363	0.407683	1.60436	0.8±0.1	0.8±04	0.7±0.3	0.5±0.1	CYP	Prostaglandin
8-isoPGF2a	AA	0	0	6.37065	0	6±2	8.4±1	4±1	6±1	non-enzymatic	Prostaglandin
12-OxoLTB4	AA	224.018	286.378	237.1	327.497	150±34	270±53	279±136	175±29	LOX	Leukotriene
LTB5	AA	0	0	0	0	12.8±7.5	0±0	4.4±4.4	0±0	LOX	Leukotriene
LTB4	AA	583.79	817.519	0	0	0±0	0±0	0±0	0±0	LOX	Leukotriene
20-COOH LTB4	AA	0.148277	0.149218	0.237098	0.116147	0.2±0.1	0.2±0.03	0.1±0.1	0.2±0.04	auto-oxidation	Leukotriene
LXA5	AA	0.440925	0	0	0.501096	0.1±0.1	0±0	0.2±0.2	0±0	LOX	Leukotriene
15-epi LXA4	AA	0	0	0	7.93248	0±0	0±0	0±0	2.1±2.1	LOX	Leukotriene
LXA4	AA	40.5483	77.5365	18.4237	33.6021	14±2	43±12	32±19	20±2	LOX	Resolving
15-OxoLXA4	AA	0.946937	2.39197	0	1.18985	0.7±1	0.6±0.5	1.8±1	0.5±0.3	Reductase	Lipoxin
LXB4	AA	24.9744	41.4945	0	34.6966	7±5	8.4±4	2.8±2	4±2	LOX	Resolving
tetranor 12-HETE	AA	7.13211	19.3617	11.016	24.7376	19±3	20±1	22±9	30±13	LOX	Alcohol
12(S)-HHTrE	AA	348.055	519.478	331.883	716.323	359±81	532±71	370±145	347±10	COX	Alcohol
9(S)-HOTrE	AA	7.60022	5.89333	9.38303	10.4257	16±4	6±0.3	15±4	4±0.2	LOX	Alcohol
13(S)-HOTrE(g)	AA	60.905	100.637	91.9696	204.059	99±17	125±29	132±46	136±51	LOX	Alcohol
13(S)-HOTrE	AA	60.0695	0	79.4661	29.53	114±20	11±5	120±36	17±4	LOX	Alcohol
9-HODE	AA	3875.86	8085.23	4425.85	10002.9	3542±552	65186±727	3591±916	4209±808	non-enzymatic	Alcohol
13-HODE	AA	6035.9	10157	6733.5	11484.3	5736±960	8327±1128	5769±1208	6120±1292	non-enzymatic	Alcohol
5-HEPE	EPA	0.348014	0	0.746353	0.67229	0.8±0.2	0.2±0.1	0.7±0.3	0.3±0.2	non-enzymatic	Alcohol
9-HEPE	EPA	15.6419	3.20085	30.994	6.06425	54±14	5.1±1	74±31	9±1	non-enzymatic	Alcohol
8-HEPE	EPA	1.35729	0.441443	2.09176	0.368186	3±1	0.5±0.05	4.2±2	0.6±0.1	non-enzymatic	Alcohol
11-HEPE	EPA	14.8609	3.7206	21.6099	7.20002	39±8	5.2±1	52±29	5.7±1	non-enzymatic	Alcohol
12-HEPE	EPA	568.533	78.1719	891.863	183.282	1490±400	146±23	2175±858	272±34	non-enzymatic	Alcohol
15(S)-HEPE	EPA	3.32587	0	4.77361	1.23301	10±3	1±1	12.5±6	0.6±0.3	LOX	Alcohol
18-HEPE	EPA	0.971326	0	1.1354	0.457223	2±1	0.3±0.1	1.7±1	0.4±0.1	non-enzymatic	Alcohol
5-HETE	AA	26.4664	54.2323	16.7395	31.6816	21±7	31±7	17±8	13±3	LOX	Alcohol
8-HETE	AA	134.567	188.496	132.686	240.925	108±22	159±18	130±60	115±16	LOX	Alcohol
11-HETE	AA	2380.26	3498.9	2629.91	4430.89	2458±364	3252±379	2418±1162	2024±142	non-enzymatic	Alcohol
12-HETE	AA	12600.3	15977.4	11724.8	12318.4	10222±1209	11100±1365	8306±17322	8333±1151	LOX	Alcohol
15-HETE	AA	106.606	194.351	118.841	251.903	126±32	230±69	105±59	96±23	LOX	Alcohol
20-HETE	AA	27.544	59.46	21.5202	29.52	20±2	30±6	25±12	6.1±6.1	CYP	Alcohol
5(S)-HETrE	AA	0.593256	1.46325	0.655284	1.67072	0.5±0.1	1.3±0.3	0.9±0.5	0.7±0.03	LOX	Alcohol
8(S)-HETrE	AA	29.0565	46.3282	47.4375	77.491	37±7	55±14	54±23	42±9	LOX	Alcohol
11(R)-HEDE	EPA	146.264	292.911	179.68	349.783	120±20	265±33	117±37	141±35	COX	Alcohol
15(S)-HEDE	EPA	16.1008	46.2383	14.8481	38.8271	16±4	30±4	13±3	17±4	non-enzymatic	Alcohol
4-HDoHE	DHA	12.1469	7.49978	11.5679	8.56572	20±8	7±2	21±11	5.6±1	Auto-oxidation	Alcohol
7-HDoHE	DHA	1.16525	0.804704	1.27106	1.17561	1.7±0.2	1±0.3	1.8±1	0.6±0.1	Auto-oxidation	Alcohol
10-HDoHE	DHA	89.2295	26.4599	172.057	67.4697	136±23	41±8	202±92	49±15	Auto-oxidation	Alcohol
14-HDoHE	DHA	1674.51	471.239	2874.82	1422.48	2760±461	737±126	3142±1380	898±245	Auto-oxidation	Resolving
8-HDoHE	DHA	0	3.54574	0	6.39012	0±0	1.7±1.7	0±0	0.9±0.9	Auto-oxidation	Resolving
13-HDoHE	DHA	63.0375	22.683	162.527	88.7038	135±25	51±13	174±99	48±8	Auto-oxidation	Alcohol
17-HDoHE	DHA	9.604	8.23499	21.3865	12.5538	27±3	6.7±0.4	13±6	7.6±1	Auto-oxidation	Alcohol
20-HDoHE	DHA	11.1214	3.84372	20.2602	11.2519	23±7	7.7±2	28±14	7.7±0.4	Auto-oxidation	Alcohol
9-OxoOTrE	AA	1.56699	0.777991	1.74209	1.69977	3±0.3	1.2±0.03	3.2±1	1±0.2	Auto-oxidation	Ketone
13-OxoODE	AA	795.238	2238.96	757.159	3115.8	679±	2007±305	1079±241	1618±396	dehydrogenase	Ketone
9-OxoODE	AA	407.934	1188.83	346.46	1787.44	392±	1119±168	494±116	621±53	Auto-oxidation	Ketone
12-OxoETE	AA	327.76	447.635	291.707	638.01	248±	200±44	217±97	205±55	LOX	Ketone
5-oxoETE	AA	7.7612	12.3392	4.79397	7.05043	5±	8.4±2	5±2	3.5±0.4	LOX	Ketone
15-OxoETE	AA	0	3.66034	1.60956	2.86621	1.6±	3.3±0.4	0±0	1.±0.5	LOX	Ketone
15-OxoEDE	AA	7.27377	19.0656	6.62329	16.9234	6±1	15±3	7.4±2	8±1	LOX	Ketone
15d-D12,14-PGJ3	EPA	10.5992	19.0937	4.29429	23.6021	8±3	16±3	7.2±1	8.9±2	COX	Prostaglandin
15d-D12,14-PGJ2	AA	0.203157	0.428298	0.599808	0.771055	1±0.1	0.6±0.1	0.3±0.1	0.4±0.1	autoreduction	Prostaglandin
2,3-dinor PGE1	AA	1.41689	2.76527	2.80668	5.92622	2±0.2	3.9±1	2±0.7	2±0.3	Oxidation	Prostaglandin
tetranor PGEM	AA	0.343408	0.185573	0.756128	0.936791	0.5±0.1	0.3±0.1	0.4±0.1	0.3±0.1	Oxidation	Prostaglandin
Bicyclo PGE2	AA	6.72922	8.27434	7.30496	11.7939	9±2	12±1	6±2	7±1	COX	Prostaglandin
PGJ2	AA	87.8391	116.551	107.507	137.745	100±16	144±24	68±29	72±12	COX	Prostaglandin
D12-PGJ2	AA	215.101	314.602	248.931	527.094	403±152	329±35	193±69	210±41	COX	Prostaglandin
PGA2	AA	87.2481	114.68	118.199	145.854	111±21	159±25	75±32	83±8	COX	Prostaglandin
Bicyclo PGE1	AA	0	0	0	0	0±0	0±0	0.1±0.1	0.3±0.1	COX	Prostaglandin
15-keto PGE2	AA	26.5516	35.4401	30.1231	53.7802	36±9	42±3	23±7	26±4	COX	Prostaglandin
PGE3	AA	11.3921	0.76178	17.8501	4.762	29±7	0±0	22±6	3.2±0.5	COX	Prostaglandin
PGD3	AA	11.3726	16.4426	15.015	18.3305	23±5	16±1	18±7	11±1	COX	Prostaglandin
13,14dh-15k-PGD2	AA	269.212	323.428	461.408	633.508	406±61	361±58	371±181	227±32	COX	Prostaglandin
15-keto PGF2a	AA	84.4682	109.331	100.839	188.881	99±19	119±6	68±22	79±16	COX	Prostaglandin
13,14dh-15k-PGE2	AA	75.6495	92.9537	91.1009	161.273	92±18	107±11	63±18	72±10	COX	Prostaglandin
15-keto PGE1	AA	0.624279	0.495442	0.63728	0.475616	1.2±0.2	1.1±0.1	0.7±0.1	0.7±0.1	COX	Prostaglandin
PGE2	AA	1369.17	2015.71	1984.15	3643.2	1964±324	2247±223	1315±391	1341±218	COX	Prostaglandin
D17-PGE1	EPA	0	7.18488	13.3227	24.9549	5±3	7±4	9±6	6±3	non-enzymatic	Prostaglandin
PGD2	AA	1395.65	1310.95	1830.86	2862.9	1142±202	1360±218	963±409	906±118	COX	Prostaglandin
11bPGF2a	AA	0	6.8411	6.37065	9.12545	6±2	8.4±1	4.3±1	5.9±0.5	prostaglandin-F synthase	Prostaglandin
PGF2a	AA	35.07	65.9956	47.3398	81.4631	41±9	59±2	35±12	32±3	COX	Prostaglandin
13,14dh-15k-PGF2a	AA	0	3.39997	0	0	0±0	1.4±1.4	0±0	0±0	COX	Prostaglandin
13,14dh-15k-PGE1	AA	0.881581	1.10684	1.20177	1.78632	0.6±0.1	1±0.1	0.6±0.3	0.7±0	COX	Prostaglandin
PGE1	AA	106.529	138.674	139.262	171.704	101±17	152±14	93±37	83±20	COX	Prostaglandin
PGF1a	AA	1.21293	2.49914	2.52	3.64316	1.9±0.3	2.4±0.1	1.7±0.5	1.6±0.2	non-enzymatic	Prostaglandin
6-keto PGE1	AA	0.756725	0.972441	0.628067	0.891697	0.5±0.2	1.1±0.1	0.3±0.1	0.4±0.3	COX	Prostaglandin
19(R)-OH PGE2	AA	0	0	0	1.04108	0±0	0±0	0±0	0.1±0.1	COX	Prostaglandin
6kPGF1a	AA	157.788	204.809	120.422	293.001	210±74	246±34	96±29	127±23	COX	Prostaglandin
19(R)-OH PGF2a	AA	0.195408	0.308288	0.393191	0.45469	0.3±0.1	0.2±0.03	0.3±0.1	0.1±0.1	non-enzymatic	Prostaglandin
6,15-diketo PGFa	AA	1.98693	4.7586	2.85204	6.18638	2.3±1	4.1±1	1.7±0.5	3.8±1	non-enzymatic	Prostaglandin
RvE3	EPA	18.5032	69.914	7.38904	39.1564	1.9±1.8	20±9	8.4±6	7±1	LOX	Resolving
10S,17S-DiHDoHE	DHA	133.131	66.8905	148.782	52.7953	63±38	19±5	68±56	16±11	LOX	Resolving
7(S)-Maresin1	DHA	160.953	117.779	161.902	147.471	53±24	31±17	114±100	24±9	LOX	Resolving
AT-RvD3	DHA	0	0	0	0	0±0	0±0	0.2±0.2	0±0	LOX	Resolving
RvD3	DHA	5.46978	0	0	0	2.8±0.4	1.5±1	15±13	2.4±1	LOX	Resolving
RvD4	DHA	0	0	0	0	0±0	0±0	5±5	0±0	LOX	Resolving
RvD5	DHA	30.1641	28.5665	34.6775	20.6463	19±6	7±1	16±7	4±2	LOX	Resolving
AT-PD1	DHA	0	51.9328	0	33.0282	0±0	20±6	0±0	5±2	LOX	Resolving
PD1	DHA	172.425	99.668	103.701	89.6137	25±14	43±9	99±74	22±7	LOX	Resolving
22-hydroxy PD1	DHA	0	0	0	0	0±0	23±2	0±0	0.8±0.8	LOX	Resolving
4,17-DiHDoHE	DHA	61.8761	0	80.1836	78.1788	26±8	15±4	63±42	14±3	LOX	Resolving
7,17-DiHDoPE	DHA	4.54972	0	0	7.21516	2.3±2	0.7±0.7	1.4±1	0.3±0.3	LOX	Resolving
RvD1	DHA	16.5111	0	2.73511	8.50358	6.2±1	4.9±1	17±11	3±0.4	LOX	Resolving
8-OxoRvD1	DHA	70.0907	136.762	47.6449	145.194	14±7	18±6	18±9	13±4	LOX	Resolving
17-OxoRvD1	DHA	11.8172	29.7753	14.2139	22.5665	3.8±1	4.8±2	5.3±4	2.6±1	LOX	Resolving
RvD2	DHA	24.179	26.8499	16.5645	39.1858	0.5±0.5	7.7±2	0±0	2.6±1	LOX	Resolving
2,3-dinor TXB2	AA	0.575775	1.6437	1.19176	3.97979	1.2±0.3	2±0.3	1.7±0.6	2.3±0.6	COX	Thromboxane
11dh TXB3	AA	4.17082	4.61039	24.5522	33.3056	5.76	6±4	5±3	7±2	COX	Thromboxane
11dh-TXB2	AA	1.49033	1.94455	2.16331	2.81331	2±0.3	3.6±1	2.5±1	1.6±0.4	COX	Thromboxane
TXB3	AA	0	0	7.58501	0	6.3±6	0±0	22±15	0±0	COX	Thromboxane
TXB2	AA	554.986	758.136	882.965	1538.12	764±165	954±114	851±461	589±48	COX	Thromboxane

## Sheet: Sheet3
	Young-LC d0	Young-SO d0	Aging-LC d0	Aging-SO d0	Young-LC d1			Average	SEM	Young-SO d1			Average	SEM	Aging-LC d1			Average	SEM	Aging-SO d1			Average	SEM
Lipid	UAB-GH-9	UAB-GH-10	UAB-GH-1	UAB-GH-2	UAB-GH-11	UAB-GH-12	UAB-GH-13			UAB-GH-14	UAB-GH-15	UAB-GH-16			UAB-GH-3	UAB-GH-4	UAB-GH-5			UAB-GH-6	UAB-GH-7	UAB-GH-8
5(S),12(S)-DiHETE	2068.79	2969.81	2262.59	3867.21	683.181	919.148	1708.83	1103.72	310.128	2281.25	3834.77	1832.88	2649.63	606.539	1492.7	4691.16	975.252	2386.37	1162.03	1267.29	2630.6	1683.41	1860.43	403.384
5(S),15(S)-DiHETE	11.3186	15.8483	15.0953	23.4898	9.50947	19.6591	16.432	15.2002	2.99398	18.1363	23.799	17.1995	19.7116	2.06153	7.8999	33.8927	3.92822	15.2403	9.39642	7.38326	8.80118	20.2397	12.1414	4.06981
8(S),15(S)-DiHETE	13.964	28.5165	11.5459	21.932	5.00019	10.8395	10.686	8.84188	1.92135	13.6786	22.1212	12.6555	16.1518	2.99928	4.38386	17.9893	4.19132	8.85484	4.56758	6.39337	0	8.94838	5.11392	2.66121
12(13)-DiHOME	32.6881	18.6127	12.5854	34.1175	7.06671	14.0167	13.7183	11.6006	2.26858	18.7139	24.846	13.7558	19.1052	3.20744	11.2835	18.0507	8.04285	12.459	2.9482	14.718	13.561	9.8951	12.7247	1.45369
9,10-DiHOME	25.0271	41.2128	9.92198	59.1046	7.85936	19.7675	13.9343	13.8537	3.43783	44.0645	38.9785	22.2012	35.0814	6.60534	19.2758	18.9563	9.1145	15.7822	3.33512	29.7441	18.5029	15.97	21.4056	4.23285
5,6-DiHETE(EPA)	5.01457	6.71031	4.97773	10.7707	1.69431	2.86449	4.35097	2.96992	0.768722	6.12125	8.3546	3.52725	6.00103	1.39483	4.0362	12.5257	2.77496	6.44562	3.06176	3.28901	6.58299	3.82916	4.56705	1.01996
5,6-DiHETrE	0.797097	1.71731	1.1753	1.77159	0.32099	2.09301	1.4105	1.27483	0.516016	1.8974	3.78944	1.14814	2.27833	0.785907	0.81095	2.38658	0.558876	1.25214	0.571873	0.69334	0.413334	0.458976	0.521883	0.0867351
11,12-DiHETrE	23.1079	15.8505	21.9958	38.837	11.1928	20.1022	18.3964	16.5638	2.73026	32.1779	56.0838	21.6839	36.6485	10.1789	18.8245	29.7759	13.2943	20.6316	4.84286	20.138	27.7628	22.2609	23.3872	2.27201
8,9-DiHETrE	9.48172	16.2738	10.172	23.7238	7.98826	7.21917	8.39841	7.86861	0.345632	21.2751	28.2467	11.4951	20.339	4.85837	15.407	43.5866	6.65711	21.8836	11.1416	22.3112	18.8721	12.8035	17.9956	2.7794
14,15-DiHETrE	38.5066	25.8201	17.4588	31.8445	8.01746	23.4122	17.9893	16.473	4.5083	23.2476	40.2391	18.1833	27.2233	6.67005	11.2112	80.8982	8.38717	33.4988	23.7137	22.6929	19.3202	17.9724	19.9951	1.40385
19,20-DiHDoPE	10.2432	4.23819	18.0852	9.05083	7.86143	9.17065	14.651	10.561	2.07962	5.4096	9.58057	4.9053	6.63182	1.48154	10.8433	36.8219	9.44852	19.0379	8.9011	6.8857	8.95663	6.54499	7.46244	0.753541
9(10)-EpOME	4729.4	13921.4	3910.07	22392.7	1621.03	3321.74	3813.79	2918.85	664.278	13413.9	20746.5	8234.44	14131.6	3629.7	1720.98	16916.2	2207.6	6948.27	4985.95	1870.77	4513.74	4630.91	3671.81	901.154
12(13)-EpOME	1789.94	4679.22	1648.97	9574.21	659.854	1367.56	1157.9	1061.77	209.875	4334.02	5742.87	2676.05	4250.98	886.288	708.877	6292.64	1029.23	2676.92	1810.23	779.041	2072.94	1903.94	1585.31	406.075
8,9-EpETE	57.8749	51.8656	46.027	101.437	10.022	64.8583	80.0739	51.6514	21.2731	46.5224	47.7806	21.5828	38.6286	8.53067	13.2247	103.267	13.7464	43.4128	29.9276	12.8051	38.2816	9.01577	20.0341	9.18906
11,12-EpETE	126.903	142.564	146.036	252.057	30.9405	161.048	241.808	144.599	61.4254	136.514	120.607	61.544	106.222	22.8059	33.5159	241.718	41.7222	105.652	68.0742	32.898	94.0865	31.7777	52.9207	20.5854
14,15-EpETE	689.267	764.825	582.502	1319.03	137.15	744.358	923.661	601.723	237.983	705.772	681.043	258.756	548.524	145.059	170.034	1237.67	162.792	523.498	357.091	167.086	449.685	174.808	263.86	92.9395
17,18-EpETE	6.27647	8.73784	7.13579	0	6.71636	21.0149	17.5755	15.1023	4.3089	0	0	0	0	0	5.41354	32.6868	6.99413	15.0315	8.83944	0	0	2.03559	0.67853	0.67853
8,9-EpETrE	1401.74	587.077	1890.88	1429.35	545.012	1414.33	2028.56	1329.3	430.368	1261.66	1580.01	786.69	1209.45	230.494	857.453	5304.63	595.941	2252.67	1527.84	539.865	875.845	629.648	681.786	100.431
11,12-EpETrE	1062.13	1447.6	904.47	1074.5	314.991	628.4	954.746	632.712	184.694	1177.38	1448	818.587	1147.99	182.29	184.892	1993.5	276.191	818.193	588.242	151.967	306.771	436.449	298.395	82.2295
5,6-EpETrE	398.851	545.45	304.263	357.346	72.7435	102.921	225.55	133.738	46.7252	300.69	409.573	178.926	296.396	66.6166	51.3504	641.774	89.6129	260.913	190.751	18.4584	73.4264	111.709	67.8647	27.0625
14,15-EpETrE	0	598.249	0	0	0	0	0	0	0	0	0	0	0	0	502.521	0	0	167.507	167.507	0	0	0	0	0
7(8)-EpDPE	39.1321	19.2179	38.2512	27.4194	20.7594	30.183	47.3919	32.7781	7.79687	32.8414	32.7206	11.5981	25.7201	7.06106	8.19368	194.709	17.4075	73.4366	60.6943	5.5073	7.69433	10.4534	7.885	1.43099
10(11)-EpDPE	446.615	782.231	394.363	1250.69	165.358	289.734	591.242	348.778	126.437	1511.09	886.61	453.038	950.247	307.087	106.568	1611.64	170.759	629.655	491.342	92.9575	592.107	244.529	309.864	147.749
13(14)-EpDPE	80.5291	49.567	80.4561	71.6666	42.6906	54.7453	84.0625	60.4995	12.2847	68.8046	62.5889	28.805	53.3995	12.4275	12.8521	339.01	31.8718	127.911	105.692	12.5797	22.3747	27.0746	20.6763	4.26961
16(17)-EpDPE	0	39.0653	0	69.735	0	0	0	0	0	52.2007	62.4695	24.4829	46.3844	11.3449	0	346.239	0	115.413	115.413	10.6859	0	22.8555	11.1805	6.60246
19(20)-EpDPE	50.8401	26.2842	0	43.1054	0	0	0	0	0	48.1407	46.4508	25.1468	39.9128	7.39907	0	337.491	0	112.497	112.497	8.41922	0	17.574	8.66441	5.07466
iPF-VI	0.478514	0.781363	0.407683	1.60436	0.56267	0.702666	1.03295	0.766094	0.139412	1.26579	1.20119	0	0.822327	0.411586	0.674653	1.19512	0.227472	0.699081	0.279602	0.775398	0.432576	0.403562	0.537178	0.119404
8-isoPGF2a	0	0	6.37065	0	2.8527	8.08974	7.69854	6.21366	1.68427	9.28757	8.87987	7.12799	8.43181	0.662448	5.21276	5.34767	2.32081	4.29375	0.987237	5.93857	4.89383	6.795	5.8758	0.549718
12-OxoLTB4	224.018	286.378	237.1	327.497	97.4078	138.173	214.786	150.122	34.4067	250.002	370.328	190.861	270.397	52.8018	161.743	550.134	124.573	278.817	136.082	149.962	232.39	143.831	175.394	28.5529
LTB5	0	0	0	0	12.2222	26.0993	0	12.7738	7.53926	0	0	0	0	0	0	0	13.1457	4.3819	4.3819	0	0	0	0	0
LTB4	583.79	817.519	0	0	0	0	0	0	0	0	0	0	0	0	0	0	0	0	0	0	0	0	0	0
20-COOH LTB4	0.148277	0.149218	0.237098	0.116147	0.216068	0.0860561	0.278136	0.19342	0.0565931	0.233295	0.165131	0.127613	0.175346	0.0309327	0.320339	0	0	0.10678	0.10678	0.105328	0.109338	0.254175	0.15628	0.048961
LXA5	0.440925	0	0	0.501096	0	0.399451	0	0.13315	0.13315	0	0	0	0	0	0.68668	0	0	0.228893	0.228893	0	0	0	0	0
15-epi LXA4	0	0	0	7.93248	0	0	0	0	0	0	0	0	0	0	0	0	0	0	0	0	6.24076	0	2.08025	2.08025
LXA4	40.5483	77.5365	18.4237	33.6021	9.95714	14.5853	17.5797	14.0407	2.21722	29.5948	66.1708	31.8603	42.542	11.8325	13.5575	70.4115	13.2583	32.4091	19.0014	16.9921	23.2329	20.4845	20.2365	1.80583
15-OxoLXA4	0.946937	2.39197	0	1.18985	0.299795	1.68301	0	0.660934	0.518313	0	1.67788	0	0.559293	0.559293	1.03617	3.24137	0.989078	1.75554	0.743041	0.50865	0.890573	0	0.466408	0.257952
LXB4	24.9744	41.4945	0	34.6966	3.71201	16.1818	0	6.63127	4.89401	12.8725	12.2749	0	8.38249	4.19479	5.22279	0	3.21128	2.81136	1.52089	4.96398	6.92185	0	3.96194	2.06002
tetranor 12-HETE	7.13211	19.3617	11.016	24.7376	13.9684	18.2902	23.3159	18.5248	2.70096	20.1068	23.0569	17.988	20.3839	1.46981	16.9281	39.3149	9.28742	21.8435	9.00986	14.2861	56.3397	20.4281	30.3513	13.1146
12(S)-HHTrE	348.055	519.478	331.883	716.323	197.274	439.355	441.256	359.295	81.0124	540.512	650.391	405.989	532.298	70.6722	315.673	643.645	151.557	370.292	144.655	339.285	335.204	367.382	347.29	10.1144
9(S)-HOTrE	7.60022	5.89333	9.38303	10.4257	11.3011	25.2246	12.3359	16.2872	4.47866	6.09192	6.35573	5.16021	5.86929	0.362623	12.3829	23.038	9.22838	14.8831	4.1779	3.20328	3.91368	3.59621	3.57106	0.205461
13(S)-HOTrE(g)	60.905	100.637	91.9696	204.059	67.5626	127.293	101.865	98.9069	17.3061	105.331	181.251	87.8857	124.823	28.6602	103.62	220.583	70.5821	131.595	45.5047	67.3513	234.985	106.149	136.162	50.6649
13(S)-HOTrE	60.0695	0	79.4661	29.53	82.0879	150.05	108.58	113.573	19.7772	13.4588	0	17.9212	10.46	5.38631	79.6763	192.109	88.1669	119.984	36.1457	13.4983	23.983	13.264	16.9151	3.53459
9-HODE	3875.86	8085.23	4425.85	10002.9	2520.42	4415.08	3690.77	3542.09	551.972	5897.28	7967.25	5689.7	6518.08	727.063	3109.56	5362.57	2300.11	3590.75	916.209	2671.23	5405.41	4549.6	4208.74	807.479
13-HODE	6035.9	10157	6733.5	11484.3	3854.62	7006.95	6347.84	5736.47	959.97	7138.4	10581.5	7261.03	8326.99	1127.83	5334.14	8045.99	3928.29	5769.47	1208.44	3837.38	8309.29	6214.33	6120.33	1291.78
5-HEPE	0.348014	0	0.746353	0.67229	0.605047	1.32803	0.584443	0.839174	0.244501	0.338963	0.397362	0	0.245441	0.123873	0.399538	1.45026	0.287341	0.712378	0.370358	0.429175	0.493689	0	0.307621	0.154934
9-HEPE	15.6419	3.20085	30.994	6.06425	46.4415	81.7733	34.7007	54.3052	14.1461	6.01546	6.00981	3.40857	5.14461	0.868022	54.9518	134.791	32.6375	74.1269	31.0087	9.35285	10.6457	6.44492	8.81449	1.24218
8-HEPE	1.35729	0.441443	2.09176	0.368186	2.19823	4.71999	2.00806	2.97543	0.874007	0.545096	0.515956	0.355937	0.472329	0.0588011	3.15508	7.59242	1.929	4.2255	1.72026	0.581705	0.75986	0.423062	0.588209	0.0972796
11-HEPE	14.8609	3.7206	21.6099	7.20002	37.2431	54.1682	25.8199	39.0771	8.23468	7.06788	5.06372	3.5748	5.23547	1.01202	27.9715	109.866	19.2847	52.3739	28.855	6.1417	6.1461	4.7747	5.6875	0.456403
12-HEPE	568.533	78.1719	891.863	183.282	1161.8	2284.74	1022.19	1489.58	399.619	168.717	169.754	100.369	146.28	22.9575	1673.45	3847.4	1005.07	2175.31	858.021	277.818	328.203	210.82	272.28	33.9983
15(S)-HEPE	3.32587	0	4.77361	1.23301	6.06557	16.7627	6.89868	9.90898	3.43529	1.94974	0	1.04431	0.998017	0.563318	8.21198	24.1652	5.25713	12.5448	5.8725	0.671689	1.17116	0	0.614284	0.339302
18-HEPE	0.971326	0	1.1354	0.457223	1.65073	3.46372	0.975383	2.02995	0.742924	0.35261	0.555929	0	0.302846	0.1624	1.16926	2.96418	0.950118	1.69452	0.637976	0.255901	0.432464	0.440226	0.376197	0.0601899
5-HETE	26.4664	54.2323	16.7395	31.6816	11.1872	35.4578	16.0302	20.8918	7.41599	36.4314	38.8273	17.7564	31.0051	6.66032	8.56398	33.2371	10.4534	17.4182	7.92827	12.6466	8.95957	17.5079	13.038	2.47544
8-HETE	134.567	188.496	132.686	240.925	64.6157	129.096	129.942	107.885	21.6359	163.07	187.214	126.356	158.88	17.6925	91.0416	247.053	51.2835	129.793	59.7428	87.8631	143.011	114.064	114.98	15.9265
11-HETE	2380.26	3498.9	2629.91	4430.89	1777.72	3023.81	2571.21	2457.58	364.176	3731.15	3520.92	2502.68	3251.58	379.335	1569.93	4714.85	968.473	2417.75	1161.6	1871.18	2307.42	1893.56	2024.05	141.831
12-HETE	12600.3	15977.4	11724.8	12318.4	8052.52	10379.7	12232.4	10221.5	1209.2	9762.25	13829.7	9708.89	11100.3	1364.79	10387.3	9664.17	4867.32	8306.27	1732.1	6382.53	10366.8	8248.9	8332.75	1150.93
15-HETE	106.606	194.351	118.841	251.903	75.1886	186.337	116.719	126.082	32.4255	351.957	224.772	113.198	229.976	68.9729	66.441	221.84	27.7923	105.358	59.3001	124.643	50.3673	113.869	96.2932	23.1726
20-HETE	27.544	59.46	21.5202	29.52	18.2109	24.6098	17.5163	20.1123	2.25765	31.6842	38.8473	18.9242	29.8186	5.82645	14.1582	48.903	11.6871	24.9161	12.0146	0	0	18.1914	6.06381	6.06381
5(S)-HETrE	0.593256	1.46325	0.655284	1.67072	0.440059	0.655049	0.418991	0.5047	0.0754203	1.48838	1.86251	0.675183	1.34202	0.350475	0.666593	1.92203	0.226936	0.938518	0.507869	0.77378	0.64073	0.68872	0.701077	0.0389022
8(S)-HETrE	29.0565	46.3282	47.4375	77.491	23.9938	47.8149	39.6516	37.1534	6.98906	44.6309	83.1812	38.061	55.291	14.0735	43.3313	97.4106	21.2458	53.9959	22.6242	27.233	58.2175	39.1463	41.5323	9.02367
11(R)-HEDE	146.264	292.911	179.68	349.783	79.059	140.008	140.273	119.78	20.3606	256.81	325.232	212.668	264.903	32.7454	79.9724	190.259	79.6002	116.611	36.8244	71.3992	185.331	167.293	141.341	35.3566
15(S)-HEDE	16.1008	46.2383	14.8481	38.8271	10.1686	22.6833	15.3084	16.0534	3.63183	25.4307	38.5089	26.5461	30.1619	4.18591	8.60568	18.8062	10.2123	12.5414	3.16655	9.36668	21.5065	19.1527	16.6753	3.71695
4-HDoHE	12.1469	7.49978	11.5679	8.56572	10.5393	35.9687	12.0883	19.5321	8.23048	8.97039	8.9374	3.13436	7.01405	1.93987	9.87108	42.3328	11.0408	21.0816	10.631	7.16619	4.32445	5.2528	5.58115	0.836606
7-HDoHE	1.16525	0.804704	1.27106	1.17561	1.46934	2.16557	1.33175	1.65555	0.258083	1.45924	1.03027	0.40969	0.966402	0.304658	0.785119	4.04812	0.480477	1.77124	1.14183	0.535499	0.563683	0.794557	0.631246	0.0820598
10-HDoHE	89.2295	26.4599	172.057	67.4697	96.6431	174.673	136.821	136.046	22.5285	40.9936	54.2074	27.7833	40.9948	7.62799	107.028	385.983	111.763	201.592	92.2061	23.7526	76.0386	47.3557	49.049	15.1174
14-HDoHE	1674.51	471.239	2874.82	1422.48	1861.28	3388.85	3028.91	2759.68	461.063	675.345	978.963	555.58	736.629	126.003	1738.07	5901.08	1785.88	3141.68	1379.77	428.127	1252.15	1012.55	897.61	244.719
8-HDoHE	0	3.54574	0	6.39012	0	0	0	0	0	5.15033	0	0	1.71678	1.71678	0	0	0	0	0	2.75743	0	0	0.919144	0.919144
13-HDoHE	63.0375	22.683	162.527	88.7038	98.7841	182.698	123.915	135.132	24.8645	74.6794	48.1428	30.9208	51.2477	12.7271	83.3723	370.333	66.7666	173.491	98.538	33.2197	60.2717	49.6559	47.7158	7.86926
17-HDoHE	9.604	8.23499	21.3865	12.5538	24.9117	32.5428	23.3302	26.9283	2.84416	6.97287	7.35222	5.89304	6.73938	0.43711	7.22978	25.1487	7.41773	13.2654	5.94191	6.29719	7.61721	8.91901	7.61114	0.756862
20-HDoHE	11.1214	3.84372	20.2602	11.2519	14.1115	36.1145	17.5196	22.5818	6.83748	10.9676	8.59143	3.44211	7.66704	2.22104	17.3598	55.4295	10.8856	27.8916	13.8952	7.02911	8.3831	7.7484	7.7202	0.391118
9-OxoOTrE	1.56699	0.777991	1.74209	1.69977	2.3378	3.62074	2.74134	2.89996	0.37875	1.19774	1.2678	1.13909	1.20154	0.0372054	2.92464	4.86824	1.86782	3.22023	0.878666	1.18176	0.807	0.666766	0.885175	0.153719
13-OxoODE	795.238	2238.96	757.159	3115.8	524.261	767.676	745.26	679.066	77.6723	1947.64	2561.58	1511.14	2006.79	304.673	1003.25	1529.4	704.144	1078.93	241.219	1209.78	2410.69	1233.35	1617.94	396.436
9-OxoODE	407.934	1188.83	346.46	1787.44	282.635	506.741	387.366	392.247	64.7398	1152.82	1392.06	813.424	1119.44	167.871	436.657	717.496	328.412	494.189	115.944	603.565	720.333	539.525	621.141	52.9292
12-OxoETE	327.76	447.635	291.707	638.01	122.18	276.098	345.208	247.829	65.916	271.302	208.09	119.465	199.619	44.0356	159.321	405.6	84.4851	216.469	97.002	207.409	299.645	108.579	205.211	55.1668
5-oxoETE	7.7612	12.3392	4.79397	7.05043	3.90853	6.87417	5.33713	5.37327	0.856298	8.5313	11.0334	5.51611	8.36027	1.59499	3.1357	9.29919	2.41081	4.94857	2.18536	4.10393	2.86887	3.46835	3.48038	0.356583
15-OxoETE	0	3.66034	1.60956	2.86621	0	2.73256	2.04413	1.59223	0.820544	4.05105	3.23933	2.47308	3.25448	0.455585	0	0	0	0	0	1.31027	0	1.75038	1.02022	0.525692
15-OxoEDE	7.27377	19.0656	6.62329	16.9234	4.55239	8.1188	6.65378	6.44166	1.03498	14.5615	20.8015	10.3741	15.2457	3.02952	5.39128	12.1988	4.6042	7.3981	2.41109	6.82337	10.2618	7.24344	8.10954	1.08295
15d-D12,14-PGJ3	10.5992	19.0937	4.29429	23.6021	4.2137	12.7866	6.33004	7.77679	2.57835	22.0834	16.0305	10.0771	16.0636	3.46596	8.62222	8.60694	4.31583	7.18166	1.43292	12.2708	8.27832	6.28552	8.94488	1.75965
15d-D12,14-PGJ2	0.203157	0.428298	0.599808	0.771055	0.222851	0.601158	0.736223	0.520078	0.153643	0.822189	0.526585	0.470622	0.606465	0.109065	0.334653	0.454663	0.116493	0.301937	0.0989823	0.515643	0.222677	0.398072	0.378797	0.0851193
2,3-dinor PGE1	1.41689	2.76527	2.80668	5.92622	1.29991	1.69596	2.1608	1.71889	0.248781	4.21193	4.65817	2.92584	3.93198	0.519302	1.33164	3.55681	1.0614	1.98328	0.790622	2.31846	1.27826	2.27243	1.95638	0.339321
tetranor PGEM	0.343408	0.185573	0.756128	0.936791	0.383926	0.476789	0.602414	0.48771	0.0633078	0.45284	0.433563	0.136193	0.340865	0.102487	0.470029	0.550053	0.15748	0.392521	0.119769	0.377065	0.257712	0.149112	0.261297	0.0658287
Bicyclo PGE2	6.72922	8.27434	7.30496	11.7939	5.63817	10.6035	11.2278	9.15651	1.76838	14.3873	10.5761	11.6132	12.1922	1.13767	5.7463	9.81842	2.65868	6.07446	2.07334	5.61747	5.39361	9.4787	6.82992	1.32596
PGJ2	87.8391	116.551	107.507	137.745	67.2818	111.396	120.193	99.6237	16.3691	191.125	113.673	128.151	144.316	23.7746	49.4045	124.896	28.0643	67.4548	29.3737	68.7128	53.6242	94.2914	72.2095	11.8691
D12-PGJ2	215.101	314.602	248.931	527.094	166.396	687.433	354.109	402.646	152.356	398.207	283.463	306.461	329.377	35.0495	164.853	324.301	90.8446	193.333	68.881	178.93	159.445	291.896	210.091	41.2878
PGA2	87.2481	114.68	118.199	145.854	69.247	128.021	137.14	111.469	21.2747	206.302	150.992	120.073	159.122	25.2219	49.9894	137.968	37.6558	75.2044	31.5831	85.0584	67.7299	96.4419	83.0767	8.34746
Bicyclo PGE1	0	0	0	0	0	0	0	0	0	0	0	0	0	0	0.417191	0	0	0.139064	0.139064	0.319428	0.454515	0	0.257981	0.134756
15-keto PGE2	26.5516	35.4401	30.1231	53.7802	18.4687	48.3502	42.284	36.3676	9.11918	48.6082	36.6545	41.3813	42.2147	3.47578	18.4431	36.0439	14.9492	23.1454	6.52765	30.8848	18.1939	29.8886	26.3224	4.07443
PGE3	11.3921	0.76178	17.8501	4.762	40.6605	16.274	30.5084	29.1476	7.0726	0	0	0	0	0	17.012	33.4284	15.2518	21.8974	5.78784	3.22551	2.27401	4.10717	3.20223	0.529318
PGD3	11.3726	16.4426	15.015	18.3305	15.7856	32.9815	20.9323	23.2331	5.09559	17.6961	15.2968	15.5946	16.1958	0.755059	11.4107	31.4303	9.86986	17.5703	6.94427	10.8346	9.57742	13.7749	11.3956	1.24374
13,14dh-15k-PGD2	269.212	323.428	461.408	633.508	286.849	447.151	485.306	406.435	60.7994	477.643	300.31	304.616	360.856	58.4064	223.59	731.97	157.822	371.127	181.417	198.011	192.096	291.475	227.194	32.1858
15-keto PGF2a	84.4682	109.331	100.839	188.881	61.505	113.851	121.344	98.8999	18.8221	129.179	108.467	119.703	119.116	5.98627	65.725	106.128	31.7112	67.8547	21.5086	67.3636	57.976	110.744	78.6947	16.2524
13,14dh-15k-PGE2	75.6495	92.9537	91.1009	161.273	55.7881	110.918	107.882	91.5294	17.8921	128.591	89.8821	103.267	107.247	11.3501	69.82	89.9489	29.7935	63.1874	17.6792	73.5151	53.8976	89.0331	72.1486	10.1657
15-keto PGE1	0.624279	0.495442	0.63728	0.475616	0.690489	1.64793	1.29371	1.21071	0.279488	1.31984	0.900331	0.987738	1.0693	0.127786	0.502139	1.02558	0.511068	0.679597	0.173013	0.936249	0.429457	0.692969	0.686225	0.146337
PGE2	1369.17	2015.71	1984.15	3643.2	1345.25	2110.3	2437.86	1964.47	323.729	2689.83	2070.67	1980.08	2246.86	223.023	1316.8	1991.42	637.852	1315.36	390.741	1214.72	1043.76	1764.86	1341.11	217.545
D17-PGE1	0	7.18488	13.3227	24.9549	4.51327	0	11.3706	5.29462	3.30557	13.0833	0	8.94109	7.34147	3.86059	6.21132	21.1608	0	9.12405	6.27981	10.0995	7.2133	0	5.77092	3.00334
PGD2	1395.65	1310.95	1830.86	2862.9	739.989	1369.33	1317.9	1142.41	201.756	1728.05	1377.98	973.872	1359.97	217.899	608.921	1777.64	500.891	962.485	408.77	678.156	970.118	1070.13	906.135	117.589
11bPGF2a	0	6.8411	6.37065	9.12545	2.8527	8.08974	7.69854	6.21366	1.68427	9.28757	8.87987	7.12799	8.43181	0.662448	5.21276	5.34767	2.32081	4.29375	0.987237	5.93857	4.89383	6.795	5.8758	0.549718
PGF2a	35.07	65.9956	47.3398	81.4631	24.6218	45.4808	53.8341	41.3122	8.68662	57.347	57.0064	62.1248	58.8261	1.65231	31.99	56.1903	16.6695	34.9499	11.5043	28.6886	29.7112	38.7834	32.3944	3.20812
13,14dh-15k-PGF2a	0	3.39997	0	0	0	0	0	0	0	0	0	4.24654	1.41551	1.41551	0	0	0	0	0	0	0	0	0	0
13,14dh-15k-PGE1	0.881581	1.10684	1.20177	1.78632	0.363148	0.677927	0.746203	0.595759	0.117964	1.07999	0.86561	1.10157	1.01572	0.0753145	0.342226	1.08266	0.306517	0.577136	0.252975	0.732307	0.631989	0.629085	0.66446	0.0339336
PGE1	106.529	138.674	139.262	171.704	78.8918	135.07	90.1845	101.382	17.1565	161.591	169.541	124.92	152.017	13.7418	70.5128	165.486	42.4047	92.8013	37.2373	52.0792	76.6883	121.054	83.274	20.1819
PGF1a	1.21293	2.49914	2.52	3.64316	1.27966	1.95042	2.34789	1.85932	0.311717	2.36397	2.41968	2.54194	2.44186	0.0525578	1.73625	2.45411	0.801283	1.66388	0.478501	1.69586	1.27008	1.8576	1.60785	0.175219
6-keto PGE1	0.756725	0.972441	0.628067	0.891697	0.244708	0.283388	1.03516	0.521085	0.257279	1.16099	1.12891	0.874892	1.05493	0.0904935	0.270684	0.469038	0.0743836	0.271368	0.113928	0.34063	0.35389	0.451305	0.381941	0.0348924
19(R)-OH PGE2	0	0	0	1.04108	0	0	0	0	0	0	0	0	0	0	0	0	0	0	0	0	0.26252	0	0.0875068	0.0875068
6kPGF1a	157.788	204.809	120.422	293.001	128.124	144.059	358.021	210.068	74.1194	287.012	271.24	178.577	245.609	33.824	88.8725	148.673	49.271	95.6055	28.8917	163.122	85.6289	131.597	126.783	22.4996
19(R)-OH PGF2a	0.195408	0.308288	0.393191	0.45469	0	0.513128	0.448625	0.320584	0.16137	0.300778	0.184521	0.211948	0.232415	0.0350863	0.338073	0.322033	0.179641	0.279916	0.0503506	0	0.203457	0.231683	0.145047	0.0729797
6,15-diketo PGFa	1.98693	4.7586	2.85204	6.18638	1.64932	0.569628	4.53428	2.25108	1.18338	5.79668	2.35665	4.21974	4.12436	0.994196	2.64639	1.3387	1.07752	1.68754	0.485318	4.55853	2.08877	4.80329	3.81686	0.866931
RvE3	18.5032	69.914	7.38904	39.1564	0	0	5.58394	1.86131	1.86131	8.72039	38.4854	12.0542	19.7533	9.41536	2.53396	19.6198	2.9519	8.36855	5.62692	4.33755	8.54875	7.00989	6.63206	1.23026
10S,17S-DiHDoHE	133.131	66.8905	148.782	52.7953	57.0939	0	131.635	62.9097	38.1109	10.4155	19.1367	27.1451	18.8991	4.83088	25.3963	177.892	0	67.7629	55.5507	9.05566	0	37.3142	15.4566	11.2371
7(S)-Maresin1	160.953	117.779	161.902	147.471	32.3245	26.1188	99.6371	52.6935	23.5401	0	59.6276	33.5916	31.0731	17.259	28.6422	313.853	0	114.165	100.186	6.42433	31.7681	32.2695	23.4873	8.53271
AT-RvD3	0	0	0	0	0	0	0	0	0	0	0	0	0	0	0	0	0.659886	0.219962	0.219962	0	0	0	0	0
RvD3	5.46978	0	0	0	2.60516	3.71041	2.10349	2.80635	0.474661	1.34558	3.1959	0	1.51382	0.926404	2.58471	41.1451	2.01463	15.2481	12.9495	0	3.72168	3.36106	2.36091	1.18504
RvD4	0	0	0	0	0	0	0	0	0	0	0	0	0	0	0	14.9882	0	4.99606	4.99606	0	0	0	0	0
RvD5	30.1641	28.5665	34.6775	20.6463	12.7689	13.1175	31.6893	19.1919	6.2495	4.66047	8.07713	8.96064	7.23275	1.31118	8.31518	30.2976	8.37905	15.6639	7.31684	0	5.18067	6.2431	3.80792	1.9285
AT-PD1	0	51.9328	0	33.0282	0	0	0	0	0	18.2999	30.833	11.3016	20.1448	5.71319	0	0	0	0	0	1.46872	6.18011	6.96307	4.87063	1.71591
PD1	172.425	99.668	103.701	89.6137	24.5713	49.5239	0	24.6984	14.2965	25.1359	54.1177	49.0721	42.7752	8.93913	21.0898	245.407	26.9967	97.8311	73.8075	8.81614	34.5124	23.2133	22.1806	7.43582
22-hydroxy PD1	0	0	0	0	0	0	0	0	0	0	0	6.75024	2.25008	2.25008	0	0	0	0	0	0	2.39363	0	0.797878	0.797878
4,17-DiHDoHE	61.8761	0	80.1836	78.1788	13.9047	23.7165	40.214	25.9451	7.67616	13.437	23.5048	9.04001	15.3273	4.28126	18.0687	146.966	23.2786	62.7711	42.1243	7.3464	17.2528	15.7959	13.465	3.08808
7,17-DiHDoPE	4.54972	0	0	7.21516	1.7773	0	5.13235	2.30322	1.50474	2.06739	0	0	0.689129	0.689129	3.40759	0	0.740879	1.38282	1.03473	0.771508	0	0	0.257169	0.257169
RvD1	16.5111	0	2.73511	8.50358	6.72932	4.71579	7.12534	6.19015	0.745994	5.53395	6.95481	2.11356	4.86744	1.43673	4.64479	38.4658	6.53396	16.5482	10.9724	2.70908	3.42771	3.94646	3.36108	0.358753
8-OxoRvD1	70.0907	136.762	47.6449	145.194	6.69444	8.05493	26.8685	13.8726	6.5098	8.61354	28.715	15.9396	17.756	5.87343	13.4874	34.7151	6.34462	18.1824	8.51963	5.02455	15.9902	18.869	13.2946	4.2177
17-OxoRvD1	11.8172	29.7753	14.2139	22.5665	1.61409	3.50266	6.23178	3.78284	1.34035	1.78435	8.57526	4.13883	4.83281	1.99084	2.25343	12.3935	1.33345	5.32681	3.54333	0	4.3139	3.54201	2.61864	1.32814
RvD2	24.179	26.8499	16.5645	39.1858	1.56899	0	0	0.522997	0.522997	6.11429	11.8105	5.15769	7.69416	2.07661	0	0	0	0	0	0	4.22803	3.56703	2.59835	1.31312
2,3-dinor TXB2	0.575775	1.6437	1.19176	3.97979	0.572933	1.62887	1.41257	1.20479	0.32204	2.59932	2.24357	1.27904	2.04064	0.394408	1.80492	2.7133	0.605485	1.7079	0.610403	2.75337	2.95341	1.20157	2.30278	0.553627
11dh TXB3	4.17082	4.61039	24.5522	33.3056	6.06516	0	10.9638	5.67631	3.17094	12.9896	0	4.7963	5.92864	3.79228	0	11.4954	2.88009	4.79184	3.45338	10.4743	3.8155	5.84669	6.71215	1.97033
11dh-TXB2	1.49033	1.94455	2.16331	2.81331	1.44991	2.55912	1.99958	2.00287	0.320206	4.25174	2.19575	4.23453	3.56067	0.682482	2.0785	4.68989	0.830623	2.533	1.13702	0.913861	2.36962	1.63133	1.63827	0.420255
TXB3	0	0	7.58501	0	19.038	0	0	6.34601	6.34601	0	0	0	0	0	7.20039	52.3147	5.80729	21.7741	15.2756	0	0	0	0	0
TXB2	554.986	758.136	882.965	1538.12	480.999	759.63	1051.03	763.887	164.568	1181.06	840.498	839.803	953.787	113.637	541.824	1758.27	251.706	850.601	461.499	544.378	684.314	539.585	589.426	47.4642
